# Supplementary material for: Wolbachia restricts insect-specific flavivirus infection in Aedes aegypti cells
Source: PubMed Central journal article supplement (PMC5120408; doi:10.1099/jgv.0.000617), 2016-11-10
Supplement: jgv-97-3024-s001.pdf [file jgv-97-3024-s001.pdf]

# Journal of General Virology

## Wolbachia restricts insect specific flavivirus infection in Aedes aegypti cells.

--Manuscript Draft--

|                              |                                                                                                                                                                                                                                                                                                                                                                                                                                                                                                                                                                                                                                                                                                                                                                                                                                                                                                                                                                                                                                                                                                                                                                                                                                                                           |
|------------------------------|---------------------------------------------------------------------------------------------------------------------------------------------------------------------------------------------------------------------------------------------------------------------------------------------------------------------------------------------------------------------------------------------------------------------------------------------------------------------------------------------------------------------------------------------------------------------------------------------------------------------------------------------------------------------------------------------------------------------------------------------------------------------------------------------------------------------------------------------------------------------------------------------------------------------------------------------------------------------------------------------------------------------------------------------------------------------------------------------------------------------------------------------------------------------------------------------------------------------------------------------------------------------------|
| <b>Manuscript Number:</b>    | JGV-D-16-00322R1                                                                                                                                                                                                                                                                                                                                                                                                                                                                                                                                                                                                                                                                                                                                                                                                                                                                                                                                                                                                                                                                                                                                                                                                                                                          |
| <b>Full Title:</b>           | Wolbachia restricts insect specific flavivirus infection in Aedes aegypti cells.                                                                                                                                                                                                                                                                                                                                                                                                                                                                                                                                                                                                                                                                                                                                                                                                                                                                                                                                                                                                                                                                                                                                                                                          |
| <b>Short Title:</b>          | Wolbachia restricts insect specific viruses                                                                                                                                                                                                                                                                                                                                                                                                                                                                                                                                                                                                                                                                                                                                                                                                                                                                                                                                                                                                                                                                                                                                                                                                                               |
| <b>Article Type:</b>         | Standard                                                                                                                                                                                                                                                                                                                                                                                                                                                                                                                                                                                                                                                                                                                                                                                                                                                                                                                                                                                                                                                                                                                                                                                                                                                                  |
| <b>Section/Category:</b>     | Insect Viruses - RNA                                                                                                                                                                                                                                                                                                                                                                                                                                                                                                                                                                                                                                                                                                                                                                                                                                                                                                                                                                                                                                                                                                                                                                                                                                                      |
| <b>Corresponding Author:</b> | Esther Schnettler<br>Bernhard Nocht Institute for Tropical Medicine<br>Hamburg, GERMANY                                                                                                                                                                                                                                                                                                                                                                                                                                                                                                                                                                                                                                                                                                                                                                                                                                                                                                                                                                                                                                                                                                                                                                                   |
| <b>First Author:</b>         | Esther Schnettler                                                                                                                                                                                                                                                                                                                                                                                                                                                                                                                                                                                                                                                                                                                                                                                                                                                                                                                                                                                                                                                                                                                                                                                                                                                         |
| <b>Order of Authors:</b>     | Esther Schnettler<br>Vatipally B. Sreenu<br>Timothy Mottram<br>Melanie McFarlane                                                                                                                                                                                                                                                                                                                                                                                                                                                                                                                                                                                                                                                                                                                                                                                                                                                                                                                                                                                                                                                                                                                                                                                          |
| <b>Abstract:</b>             | <p>Mosquito-borne viruses are known to cause disease in humans and livestock and are often difficult to control due the lack of specific antivirals and vaccines. The Wolbachia endosymbiont has been widely studied for its ability to restrict positive strand RNA virus infection in mosquitoes, although little is known about the precise antiviral mechanism. In recent years, a variety of insect-specific viruses have been discovered in mosquitoes and an interaction with mosquito-borne viruses have been reported for some of them; however nothing is known about the effect of Wolbachia on insect specific virus infection in mosquitoes. Here, we show that transinfection of the drosophila derived wMelPop Wolbachia strain into Ae. aegypti-derived cells resulted in inhibition and even clearance of the persistent cell fusing agent flavivirus infection in these cells. This, broadens the antiviral activity of Wolbachia from acute infections to persistent infections and from arboviruses to mosquito-specific viruses. In contrast, no effect on the Phasi-Charoen-like bunyavirus persistent infection in these cells was observed, suggesting a difference in Wolbachia inhibition between positive and negative strand RNA viruses.</p> |

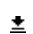

1 ***Wolbachia* restricts insect specific flavivirus infection in *Aedes aegypti* cells.**

2

3 Esther Schnettler<sup>1,2#</sup>, Vatipally B. Sreenu<sup>1</sup>, Timothy Mottram<sup>1</sup> and Melanie McFarlane<sup>1</sup>

4

5 <sup>1</sup>MRC-University of Glasgow Centre for Virus Research, Glasgow G61 1QH, Scotland, UK

6 <sup>2</sup>Current address: BNITM, Bernhard-Nocht-Strasse 74, 20359 Hamburg, Germany

7

8

9 #Corresponding author

10 Email: [Schnettler@bnitm.de](mailto:Schnettler@bnitm.de),

11 Phone: +49 40 42818-0

12

13

14 **Running title:** *Wolbachia* restricts insect specific viruses

15 **Key words:** *Wolbachia*, insect specific virus, CFAV, PCLV, *Ae. aegypti*

16

17 **Abstract**

18 Mosquito-borne viruses are known to cause disease in humans and livestock and are often  
19 difficult to control due the lack of specific antivirals and vaccines. The *Wolbachia*  
20 endosymbiont has been widely studied for its ability to restrict positive strand RNA virus  
21 infection in mosquitoes, although little is known about the precise antiviral mechanism. In  
22 recent years, a variety of insect-specific viruses have been discovered in mosquitoes and an  
23 interaction with mosquito-borne viruses have been reported for some of them; however,  
24 nothing is known about the effect of *Wolbachia* on insect specific virus infection in  
25 mosquitoes. Here we show that transinfection of the drosophila derived wMelPop  
26 *Wolbachia* strain into *Ae. aegypti*-derived cells resulted in inhibition and even clearance of  
27 the persistent cell fusing agent flavivirus infection in these cells. This broadens the antiviral  
28 activity of *Wolbachia* from acute infections to persistent infections and from arboviruses to  
29 mosquito-specific viruses. In contrast, no effect on the Phasi-Charoen-like bunyavirus  
30 persistent infection in these cells was observed, suggesting a difference in *Wolbachia*  
31 inhibition between positive and negative strand RNA viruses.

32

### 33 **Introduction**

34 Arboviruses are comprised of human and animal pathogens that are transmitted via blood  
35 feeding arthropod vectors, including mosquitoes. Due to the lack of efficient antivirals and  
36 vaccines against most of these viruses, vector control is an important intervention strategy  
37 to reduce the impact of these viruses on human and animal health (Kean et al., 2015,  
38 Weaver and Reisen, 2010). In recent years the use of the endosymbiotic intracellular  
39 bacterium, *Wolbachia* has been a well studied approach to control arbovirus transmission by  
40 mosquitoes and in particular by *Aedes aegypti* (Rainey et al., 2014, Iturbe-Ormaetxe et al.,  
41 2011). *Wolbachia* was first shown to confer resistance to RNA viruses in *Drosophila*-virus  
42 systems (Hedges et al., 2008, Teixeira et al., 2008). Later, transinfection of drosophila  
43 derived *Wolbachia* into *Ae. aegypti* (which is not known to naturally harbour these  
44 endosymbionts) or its derived cell lines resulted in resistance to the important mosquito-  
45 borne dengue (DENV) and chikungunya viruses (Walker et al., 2011, Moreira et al., 2009).  
46 This has resulted in successful field trials of *Ae. aegypti* transinfected with *Wolbachia*,  
47 proving its ability to reduce DENV transmission in natural settings (Frentiu et al., 2014).  
48 Moreover, *Wolbachia* can be stably maintained in nature, as crosses between non-infected  
49 females and infected males do not result in any offspring (Hoffmann et al., 2011, Hoffmann  
50 et al., 2014). This unique feature is called cytoplasmic incompatibility (McMeniman et al., 2009)  
51 and gives a reproductive advantage to infected female mosquitoes, resulting in the spread of  
52 *Wolbachia* through the mosquito population (Sinkins, 2004).

53 The mechanism(s) of virus inhibition through *Wolbachia* is not known. Inhibition has been  
54 linked to *Wolbachia* density, with the resistant phenotype observed only with *Wolbachia*  
55 strains producing high concentrations of bacteria in infected cells (Osborne et al., 2012,  
56 Osborne et al., 2009). Recent findings, show the ability of *Wolbachia* to interfere with early  
57 events in virus replication, suggesting an intrinsic mechanism for viral resistance (Rainey et  
58 al., 2016).

59 It should be noted that *Wolbachia*-mediated virus resistance has only been reported for  
60 positive-stranded RNA viruses and no resistance has yet been reported for negative-  
61 stranded RNA viruses (Rainey et al., 2014), which include a variety of important mosquito-  
62 borne viruses such as Rift Valley fever virus (*Bunyaviridae*).

63 Further to arboviruses, mosquitoes have also been shown to be infected with additional  
64 viruses, called insect specific viruses (ISVs) as they replicate exclusively in insect cells. The list

65 of ISVs is steadily increasing through novel identification methods, including next generation  
66 sequencing. ISVs belong to different virus families/genera, including the *Bunyaviridae* and  
67 *Flaviviridae* families, which also include important arboviruses. ISVs belonging to the  
68 *Flavivirus* genus share sequence similarities with their arbovirus counterparts, but cluster as  
69 a single defined group suggesting independent evolution. In contrast, ISVs belonging to the  
70 *Bunyaviridae*, cluster into several defined groups across the virus family (Bolling et al., 2015,  
71 Marklewitz et al., 2015). ISV infections, at least in cell culture, normally result in initial  
72 cytopathic effect (CPE), followed by progression into a persistent, non-cytopathic infection  
73 (Bolling et al., 2015, Marklewitz et al., 2015).

74

75 The increasing numbers of ISVs identified in mosquitoes and derived cells suggest that a  
76 large number of mosquitoes in the wild are naturally infected with ISVs and that vertical  
77 transmission is the main infection and maintenance route. Thereby one can expect that  
78 mosquitoes in the wild can be infected by several viruses, including ISVs and/or arboviruses.  
79 Moreover, the interaction between ISV and arbovirus infections (either co-infected or  
80 sequentially infected) results in either inhibition or increased replication/infection of one of  
81 the viruses (Kean et al., 2015). It is suggested that such interactions could partly define  
82 vector competence of a mosquito in the wild to a given arbovirus.

83

84 No information is available at the moment about the interaction of *Wolbachia* with these  
85 ISVs or what effect *Wolbachia* transinfection could have on mosquitoes already persistently  
86 infected with RNA viruses. The inhibitory effect of *Wolbachia* on RNA viruses has only been  
87 investigated in light of an acute virus infection following a persistent *Wolbachia*  
88 transinfection (Rainey et al., 2014).

89

90 In order to address these questions and to understand if *Wolbachia* interacts with acute or  
91 persistent infections of ISVs we have used the *Ae. aegypti*-derived Aag2 cell line previously  
92 transinfected with the drosophila derived *Wolbachia* strain wMelPop (known to grow to high  
93 titres and mediate DENV resistance) (Hedges et al., 2008, Teixeira et al., 2008) to investigate  
94 the effect of *Wolbachia* on two ISVs, known to be present in Aag2 cells and belonging to  
95 different families: positive strand RNA cell fusing agent virus (CFAV, *Flaviviridae*) (Scott et al.,  
96 2010) and the negative strand RNA Phasi-charoen-like bunyavirus (PCLV, *Bunyaviridae*)

97 (Maringer et al., 2015). Our results show that *Wolbachia* can confer resistance to CFAV  
98 infection independently of the time of *Wolbachia* transinfection. In contrast, no viral  
99 inhibition by *Wolbachia* was observed for PCLV in these experiments.

100

## 101 **Results**

102

### 103 **Effect of *Wolbachia* on small RNA production in Aag2 cells**

104 Aag2 cells can be stably transinduced with the wMelP strain of *Drosophila*, resulting in a  
105 reduction of small RNAs in the cytoplasm due to inhibition of small RNA transport from the  
106 nucleus to the cytoplasm (Mayoral et al. 2014). Aag2 cells are known to be persistently  
107 infected with the insect-specific flavivirus, CFAV and as result produce CFAV-specific small  
108 RNAs (Scott et al., 2010). Recently it has also been reported that Aag2 cells produce  
109 transcripts and proteins from another ISV, PCLV (suggesting a persistent infection) (Maringer  
110 et al., 2015). However, it is not yet known if this is due to an active virus infection. This virus  
111 has also been recently discovered in wild mosquitoes in Brazil (Aguilar et al., 2015). Therefore  
112 we re-analysed the previously reported small RNA data of Aag2 and Aag2wMelPop cells  
113 (Mayoral et al., 2014) and mapped them to CFAV or PCLV. Nearly no small RNA reads were  
114 detected in Aag2wMelPop cells mapping to CFAV, despite being observed in the parental  
115 Aag2 cells (Fig. 1a). The majority of CFAV small RNAs in the parental Aag2 cells were 21 nts in  
116 size with similar amounts mapping to the genome and the antigenome. In contrast, small  
117 RNAs mapping against PCLV were identified in Aag2 cells and Aag2wMelPop cells with a  
118 higher percentage in the Aag2wMelPop cells (Fig. 1b). The majority of PCLV small RNAs were  
119 26-30nts, mapped to the antigenome and had sequence specificities seen for ping-pong  
120 derived piRNAs (adenine at position 10, A<sub>10</sub>, and Uridine at position 1, U<sub>1</sub>) (Fig. S1). The S  
121 segment could be considered as highest producer of PCLV specific small RNAs, followed by  
122 the L- and the M-segment. For the S- and M-segment a bias could be observed for small  
123 RNAs of 26-30 nts mapping mainly to the antigenome. For the L-segment similar amounts of  
124 small RNAs mapping to the genome/antigenome were detected with a slight bias for the  
125 genome (Fig. 1c). Small RNAs of 26-30nts mapping to the genome and antigenome of CFAV  
126 were detected only in parental Aag2 cells and were absent from Aag2wMelPop cells (Fig.  
127 1a). These 26-30nt RNAs contained the U<sub>1</sub> bias but lacked the A<sub>10</sub> bias (Fig. S2). The small  
128 number of CFAV specific small RNAs of 26-30nt in length meant it was not possible to

129 analyse the sequence logos for the CFAV specific sequences in Aag2wMelPop cells. The  
130 presence or absence of wMelPop as well as PCLV and CFAV in these cells was determined by  
131 RT-PCR (Fig. 1d). This data suggested that wMelPop reduces or even clears CFAV infection in  
132 persistently infected Aag2 cells, but has no or little effect on PCLV.

133

#### 134 **Effect of *Wolbachia* on persistent or acute ISV infection in Aag2 cells**

135 The presence of active PCLV production/infection in Aag2 and Aag2wMelPop cells was  
136 further confirmed by RT-PCR and was also detected following the transfer of supernatant  
137 from these cells to C6/36 cells, resulting in PCLV positive C6/36 cells (Fig. 2a and b). CFAV  
138 could be easily detected by RT-PCR in Aag2 cells as well as in C6/36 cells incubated with Aag2  
139 supernatant in contrast to Aag2wMelPop or C6/36 cells incubated with Aag2wMelPop  
140 supernatant (Fig. 2a and b). To determine if the presence of wMelPop in Aag2 cells cured the  
141 cells from CFAV infection or just strongly inhibited CFAV replication/infection, Aag2wMelPop  
142 cells were treated with tetracycline over several passages resulting in the loss of *Wolbachia*.  
143 The absence of *Wolbachia* in Aag2wMelPop-tetracycline treated cells (called Aag2wMelPop-  
144 tet) was confirmed by RT-PCR (Fig. 2a). Similar to what is seen in the parental Aag2wMelPop  
145 cells no CFAV could be detected in Aag2wMelPop-tet cells (Fig. 2a), even if a different region  
146 of the CFAV genome was used for detection (Fig. S3a), or in C6/36 cells incubated with  
147 Aag2wMelPop-tet supernatant (Fig. 2b). In contrast, PCLV was detected in each of these  
148 samples (Fig. 2a and b). This suggested that wMelPop transinfection cures Aag2 cells from  
149 the persistent CFAV infection, but has no effect on PCLV. To exclude that tetracycline  
150 treatment by itself inhibits CFAV; Aag2 cells were treated with tetracycline and CFAV levels  
151 were monitored over time. No effect on CFAV could be detected in tetracycline treated Aag2  
152 cells compared to untreated cells (S3b).

153 To determine if wMelPop has a similar effect on an acute ISV infection, Aag2wMelPop and  
154 Aag2wMelPop-tet cells were incubated with Aag2 supernatant containing both CFAV and  
155 PCLV; and viral RNA detected by qRT-PCR (Fig. 2c and 2d, respectively). Significantly less  
156 CFAV RNA was detected in Aag2wMelPop compared to Aag2wMelPop-tet cells. In contrast,  
157 no significant difference in PCLV RNA was observed under any of the used conditions.

158 In summary, these results show that wMelPop can inhibit CFAV infection in Aag2 cells,  
159 regardless of whether it is an acute or persistent infection, even resulting in total loss of  
160 CFAV in case of persistently infected cells. In contrast, no effect of PCLV was observed by

161 wMelPop in Aag2 cells.

162

## 163 **Discussion**

164 *Wolbachia* endosymbionts have been studied for their ability to restrict RNA virus infection  
165 in drosophila and *Ae. aegypti* mosquitoes as well as their derived cell lines (Kean et al., 2015,  
166 Rainey et al., 2014). Little is known about the effects mediated by *Wolbachia* to induce  
167 antiviral activity, although density has been reported to be important (Osborne et al., 2012,  
168 Osborne et al., 2009). Moreover, *Wolbachia* has recently been shown to inhibit early events  
169 during viral infection (Rainey et al., 2016). Over the last decade a variety of ISVs have been  
170 discovered in mosquitoes and for some of them an interaction with mosquito-borne viruses  
171 have been reported which may be either beneficial or disadvantageous for these viruses  
172 (Bolling et al., 2015, Kean et al., 2015). However, nothing is known about the effect of  
173 *Wolbachia* transinfection on ISVs present in mosquitoes and if there is a difference in the  
174 interaction depending on the virus (e.g. positive versus negative strand RNA virus).  
175 Transinfection of wMelPop into *Ae. aegypti*-derived Aag2 cells resulted in the inhibition and  
176 even clearance of the persistent CFAV infection in these cells, broadening the antiviral  
177 activity of *Wolbachia* from acute infections to persistent infections. This could also be  
178 observed on the level of small RNA production, which were produced in Aag2 cells but not  
179 wMelPop Aag2 cells. Similar antiviral effects by *Wolbachia* were observed if these cured cells  
180 were freshly infected with an acute CFAV infection. In contrast, no effect on PCLV persistent  
181 infection in these cells was observed after wMelPop transinfection; in addition,  
182 superinfection of PCLV in the already transinfected wMelPop cells resulted in no difference  
183 in PCLV replication. As expected from these results, small RNAs against PCLV were produced  
184 in both Aag2 and wMelPop Aag2 cells.

185 CFAV-specific small RNAs showed a bias for 21 nts, the typical size of Dicer-2 produced  
186 siRNAs, as previously reported for CFAV (Scott et al., 2010) and other arthropod-borne  
187 flaviviruses (WNV, DENV). In contrast, PCLV specific small RNAs were mainly in the size of 26-  
188 30 nts, had a bias for the antigenome and showed sequence specific features for ping-pong  
189 derived piRNAs ( $A_{10}$  and  $U_1$  bias) (Fig. S1). Similar results have been reported for other  
190 arthropod-borne bunyaviruses (Schnettler et al., 2013b, Leger et al., 2013); specifically for  
191 Rift valley fever virus infection at later time points of infection (Leger et al., 2013).  
192 Interestingly, CFAV small RNAs of 26-30nt in length show the classic ping-pong signature of



193 U<sub>1</sub> bias in the positive (genome) orientation but lack the A<sub>10</sub> bias in the negative  
194 (antigenome) orientation (Fig S2). This raises the question of whether these small RNAs are  
195 in fact piRNAs, or whether just one type of piRNAs are produced in CFAV infection of Aag2  
196 cells, or if some small RNAs are products of some other RNA decay pathway. These results  
197 illustrated a difference in the ability of the endosymbiont to interfere with persistently  
198 infecting ISVs from different families. Until now *Wolbachia* has only been reported to have  
199 an antiviral effect against positive strand RNA viruses during an acute infection (Frentiu et  
200 al., 2014, Martinez et al., 2014, Rainey et al., 2016, Rainey et al., 2014) and the lack of effect  
201 of *Wolbachia* on PCLV is the first study to look at the interaction with a negative strand RNA  
202 virus. Whether the observed lack of antiviral activity by *Wolbachia* is PCLV specific or could  
203 be broadened to other negative strand RNA viruses still requires investigation. No antiviral  
204 effect was observed if persistently PCLV infected and wMelPop positive cells were  
205 superinfected with PCLV. It is not yet known if this is due to the inability of wMelPop to  
206 inhibit PCLV infection, even at an acute stage of infection, or due to the inability of Aag2 cells  
207 to be superinfected with PCLV. Nonetheless, this raises some important questions for the  
208 field. For example, is *Wolbachia* mediated inhibition limited to certain virus families and if  
209 yes why is this the case? Could this be linked with the different small RNA profiles observed  
210 for flaviviruses versus bunyaviruses? How does this drive evolution of arboviruses or ISVs  
211 following the artificial introduction of *Wolbachia* into vector mosquitoes? What are the  
212 interactions between *Wolbachia* and ISVs and how do they influence vector competence in  
213 ISV infected mosquitoes? Moreover, could it, for example during larger outbreaks involving  
214 many arboviruses, channel certain types of mosquito-borne pathogens and result in  
215 preferential amplification? Co-infection studies in mosquito systems with different families  
216 of arboviruses as well as ISVs are required to answer such questions.

217 In summary, wMelPop is able to efficiently inhibit persistent and acute infection of the  
218 positive strand RNA insect-specific CFAV in Aag2 cells but has no effect on the persistent  
219 infection by the negative strand RNA PCLV. Future research will have to investigate what  
220 effect *Wolbachia* transinfection has on other ISVs as well as its effect on the complex  
221 interplay between ISVs, arboviruses and the mosquito vector and how this  
222 influences/changes vector competence to different mosquito-borne viruses.

223

224

225 **Methods**

226 **Cells and viruses**

227 *Ae. aegypti*-derived Aag2 wt, wMelPop transinfected or wMelPop transinfected and treated  
228 with tetracycline were maintained in Mitsuhashi and Maramorosch/ Schneider's (50:50)  
229 media supplemented with 10% foetal calf serum and 10% tryptose phosphate broth and  
230 PenStrep at 26° C. Aag2 and wMelPop transinfected cells were received from S. O'Neill and  
231 have been previously described (Mayoral et al., 2014). Aag2wMelPop-tet cells were  
232 produced by passaging Aag2wMelPop cells with 10ug/ml tetracycline for 4 passages and  
233 maintained as described. C6/36 cells were maintained in L15 media supplemented with 10%  
234 foetal calf serum and 10% tryptose phosphate broth and PenStrep at 28° C. CFAV and PCLV  
235 were derived from Aag2 wt supernatant.

236

237 **Reverse transcription, PCR and qRT-PCR**

238 Reverse transcription (RT)-PCR was performed with total RNA (1500 ng) isolated using TRIzol  
239 (Invitrogen), Superscript III and oligo-dT primer, according to the manufacturer's protocol.  
240 CFAV, PCLV, *Wolbachia* and actin were detected and amplified by PCR (2 µl of the cDNA  
241 reaction) using corresponding primers (PCLV-N-FW: CAGTTAAAGCATTTAATCGTATGATAA;  
242 PCLV-N-RV: CACTAAGTGTTACAGCCCTTGGT; CFAV(3359 nt)-FW:  
243 GTTGACGACATATTGAAGAGATACG; CFAV(4060 nt)-RV: GCCAAGGATACAGTCCAAAAC; CFAV-  
244 3UTR-FW: TAGACGTGATCGAATAGAGCCG; CFAV-3UTR-RV:  
245 GCGCATCTATGGTATAGAAAAGATAAT or previously described (Rainey et al., 2016, Schnettler  
246 et al., 2013a)). Quantitative detection of CFAV, PCLV and the housekeeping gene S7 was  
247 performed using specific primers (PCLV-N-qRT-FW: ATAGTGTTGGGACGAGGAGGG; PCLV-N-  
248 qRT-RV: AGGTGCCAACAGGAAACT; CFAV-qRT-FW: CTGATGTGCGTGCGATTCTT; CFAV-qRT-  
249 RV: CACAACGGTAGCGAGAGACA or as previously described (McFarlane et al., 2014)), SYBR  
250 green Mastermix (Abi) and an ABI7500 Fast cyclor according to manufacturer's protocol.

251

252 **Virus infection**

253 Aag2wMelPop or Aag2wMelPop-tet cells were incubated with 200 µl Aag2 supernatant for  
254 24 h; followed by 3x PBS washes and addition of fresh culture medium. RNA was isolated at  
255 48 hours post infection.

256

257 **Small RNA analysis**

258 Small RNA reads from Aag2 (SRR1174240, and SRR1174241) and Aag2wMelPop cells  
259 (SRR1174242 and SRR1174243) published previously (Mayoral et al., 2014) were re-  
260 analysed. The datasets were downloaded from SRA database and FastqQ reads were  
261 extracted using SRA toolkit. Using blastn these reads were mapped to the CFAV (NCBI  
262 accession number NC\_001564.1) and PCLV (NCBI accession numbers KR003786.1,  
263 KR003784.1 and KR003785.1 correspond to L, M and S segments respectively) genome and  
264 antigenome. Hits that were matching and 20nt to 30nt with one maximum mismatch were  
265 taken for later analysis. These hits were further categorised into two groups, mapping to the  
266 genome and mapping to anti-genome.

267

268 **Acknowledgments**

269 This work was supported by the MRC (MC\_UU\_12014). The authors want to thank Scott  
270 O'Neill for providing the Aag2 and Aag2wMelPop cells and members of the Kohl lab for  
271 critical reading of the manuscript.

272

273

274 **References**

- 275 AGUIAR, E. R., OLMO, R. P., PARO, S., FERREIRA, F. V., DE FARIA, I. J., TODJRO, Y. M., LOBO, F. P.,  
 276 KROON, E. G., MEIGNIN, C., GATHERER, D., IMLER, J. L. & MARQUES, J. T. 2015. Sequence-  
 277 independent characterization of viruses based on the pattern of viral small RNAs produced by the host.  
 278 *Nucleic Acids Res*, 43, 6191-206.
- 279 BOLLING, B. G., WEAVER, S. C., TESH, R. B. & VASILAKIS, N. 2015. Insect-Specific Virus Discovery:  
 280 Significance for the Arbovirus Community. *Viruses*, 7, 4911-28.
- 281 FRENTIU, F. D., ZAKIR, T., WALKER, T., POPOVICI, J., PYKE, A. T., VAN DEN HURK, A., MCGRAW,  
 282 E. A. & O'NEILL, S. L. 2014. Limited dengue virus replication in field-collected *Aedes aegypti*  
 283 mosquitoes infected with *Wolbachia*. *PLoS Negl Trop Dis*, 8, e2688.
- 284 HEDGES, L. M., BROWNLIE, J. C., O'NEILL, S. L. & JOHNSON, K. N. 2008. *Wolbachia* and virus protection  
 285 in insects. *Science*, 322, 702.
- 286 HOFFMANN, A. A., ITURBE-ORMAETXE, I., CALLAHAN, A. G., PHILLIPS, B. L., BILLINGTON, K.,  
 287 AXFORD, J. K., MONTGOMERY, B., TURLEY, A. P. & O'NEILL, S. L. 2014. Stability of the wMel  
 288 *Wolbachia* Infection following invasion into *Aedes aegypti* populations. *PLoS Negl Trop Dis*, 8, e3115.
- 289 HOFFMANN, A. A., MONTGOMERY, B. L., POPOVICI, J., ITURBE-ORMAETXE, I., JOHNSON, P. H.,  
 290 MUZZI, F., GREENFIELD, M., DURKAN, M., LEONG, Y. S., DONG, Y., COOK, H., AXFORD, J.,  
 291 CALLAHAN, A. G., KENNY, N., OMODEI, C., MCGRAW, E. A., RYAN, P. A., RITCHIE, S. A.,  
 292 TURELLI, M. & O'NEILL, S. L. 2011. Successful establishment of *Wolbachia* in *Aedes* populations to  
 293 suppress dengue transmission. *Nature*, 476, 454-7.
- 294 ITURBE-ORMAETXE, I., WALKER, T. & SL, O. N. 2011. *Wolbachia* and the biological control of mosquito-  
 295 borne disease. *EMBO Rep*, 12, 508-18.
- 296 KEAN, J., RAINEY, S., MCFARLANE, M., DONALD, C., SCHNETTLER, E., KOHL, A. & PONDEVILLE,  
 297 E. 2015. Fighting Arbovirus Transmission: Natural and Engineered Control of Vector Competence in  
 298 *Aedes* Mosquitoes. *Insects*, 6, 236.
- 299 LEGER, P., LARA, E., JAGLA, B., SISMEIRO, O., MANSUROGLU, Z., COPPEE, J. Y., BONNEFOY, E. &  
 300 BOULOY, M. 2013. Dicer-2- and Piwi-mediated RNA interference in Rift Valley fever virus-infected  
 301 mosquito cells. *J Virol*, 87, 1631-48.
- 302 MARINGER, K., YOUSUF, A., HEESOM, K., FERNANDEZ-SESMA, A., MATTHEWS, D. A. &  
 303 DAVIDSON, A. D. 2015. De novo 'proteomics informed by transcriptomics' analysis of *Aedes aegypti*  
 304 cells identifies novel ORFs, active transposable elements and persistent viruses. *Conference paper*.
- 305 MARKLEWITZ, M., ZIRKEL, F., KURTH, A., DROSTEN, C. & JUNGLEN, S. 2015. Evolutionary and  
 306 phenotypic analysis of live virus isolates suggests arthropod origin of a pathogenic RNA virus family.  
 307 *Proc Natl Acad Sci U S A*, 112, 7536-41.
- 308 MARTINEZ, J., LONGDON, B., BAUER, S., CHAN, Y. S., MILLER, W. J., BOURTZIS, K., TEIXEIRA, L.  
 309 & JIGGINS, F. M. 2014. Symbionts commonly provide broad spectrum resistance to viruses in insects:  
 310 a comparative analysis of *Wolbachia* strains. *PLoS Pathog*, 10, e1004369.
- 311 MAYORAL, J. G., ETEBARI, K., HUSSAIN, M., KHROMYKH, A. A. & ASGARI, S. 2014. *Wolbachia*  
 312 infection modifies the profile, shuttling and structure of microRNAs in a mosquito cell line. *PLoS One*,  
 313 9, e96107.
- 314 MCFARLANE, M., ARIAS-GOETA, C., MARTIN, E., O'HARA, Z., LULLA, A., MOUSSON, L., RAINEY,  
 315 S. M., MISBAH, S., SCHNETTLER, E., DONALD, C. L., MERITS, A., KOHL, A. & FAILLOUX, A.  
 316 B. 2014. Characterization of *Aedes aegypti* Innate-Immune Pathways that Limit Chikungunya Virus  
 317 Replication. *PLoS Negl Trop Dis*, 8, e2994.
- 318 MCMENIMAN, C. J., LANE, R. V., CASS, B. N., FONG, A. W., SIDHU, M., WANG, Y. F. & O'NEILL, S. L.  
 319 2009. Stable introduction of a life-shortening *Wolbachia* infection into the mosquito *Aedes aegypti*.  
 320 *Science*, 323, 141-4.
- 321 MOREIRA, L. A., ITURBE-ORMAETXE, I., JEFFERY, J. A., LU, G., PYKE, A. T., HEDGES, L. M.,  
 322 ROCHA, B. C., HALL-MENDELIN, S., DAY, A., RIEGLER, M., HUGO, L. E., JOHNSON, K. N.,  
 323 KAY, B. H., MCGRAW, E. A., VAN DEN HURK, A. F., RYAN, P. A. & O'NEILL, S. L. 2009. A  
 324 *Wolbachia* symbiont in *Aedes aegypti* limits infection with dengue, Chikungunya, and Plasmodium.  
 325 *Cell*, 139, 1268-78.
- 326 OSBORNE, S. E., ITURBE-ORMAETXE, I., BROWNLIE, J. C., O'NEILL, S. L. & JOHNSON, K. N. 2012.  
 327 Antiviral protection and the importance of *Wolbachia* density and tissue tropism in *Drosophila*  
 328 *simulans*. *Applied and environmental microbiology*, 78, 6922-9.
- 329 OSBORNE, S. E., LEONG, Y. S., O'NEILL, S. L. & JOHNSON, K. N. 2009. Variation in antiviral protection  
 330 mediated by different *Wolbachia* strains in *Drosophila simulans*. *PLoS Pathog*, 5, e1000656.
- 331 RAINEY, S. M., MARTINEZ, J., MCFARLANE, M., JUNEJA, P., SARKIES, P., LULLA, A., SCHNETTLER,  
 332 E., VARJAK, M., MERITS, A., MISKA, E. A., JIGGINS, F. M. & KOHL, A. 2016. *Wolbachia* Blocks  
 333 Viral Genome Replication Early in Infection without a Transcriptional Response by the Endosymbiont  
 334 or Host Small RNA Pathways. *PLoS Pathog*, 12, e1005536.

335 RAINEY, S. M., SHAH, P., KOHL, A. & DIETRICH, I. 2014. Understanding the Wolbachia-mediated  
336 inhibition of arboviruses in mosquitoes: progress and challenges. *J Gen Virol*, 95, 517-30.  
337 SCHNETTLER, E., DONALD, C. L., HUMAN, S., WATSON, M., SIU, R. W., MCFARLANE, M.,  
338 FAZAKERLEY, J. K., KOHL, A. & FRAGKLOUDIS, R. 2013a. Knockdown of piRNA pathway  
339 proteins results in enhanced Semliki Forest virus production in mosquito cells. *J Gen Virol*, 94, 1680-9.  
340 SCHNETTLER, E., RATINIER, M., WATSON, M., SHAW, A. E., MCFARLANE, M., VARELA, M.,  
341 ELLIOTT, R. M., PALMARINI, M. & KOHL, A. 2013b. RNA interference targets arbovirus  
342 replication in Culicoides cells. *J Virol*, 87, 2441-54.  
343 SCOTT, J. C., BRACKNEY, D. E., CAMPBELL, C. L., BONDU-HAWKINS, V., HJELLE, B., EBEL, G. D.,  
344 OLSON, K. E. & BLAIR, C. D. 2010. Comparison of dengue virus type 2-specific small RNAs from  
345 RNA interference-competent and -incompetent mosquito cells. *PLoS Negl Trop Dis*, 4, e848.  
346 SINKINS, S. P. 2004. Wolbachia and cytoplasmic incompatibility in mosquitoes. *Insect Biochemistry and*  
347 *Molecular Biology*, 34, 723-9.  
348 TEIXEIRA, L., FERREIRA, A. & ASHBURNER, M. 2008. The bacterial symbiont Wolbachia induces  
349 resistance to RNA viral infections in *Drosophila melanogaster*. *PLoS Biol*, 6, e2.  
350 WALKER, T., JOHNSON, P. H., MOREIRA, L. A., ITURBE-ORMAETXE, I., FRENTIU, F. D.,  
351 MCMENIMAN, C. J., LEONG, Y. S., DONG, Y., AXFORD, J., KRIESNER, P., LLOYD, A. L.,  
352 RITCHIE, S. A., O'NEILL, S. L. & HOFFMANN, A. A. 2011. The wMel Wolbachia strain blocks  
353 dengue and invades caged *Aedes aegypti* populations. *Nature*, 476, 450-3.  
354 WEAVER, S. C. & REISEN, W. K. 2010. Present and future arboviral threats. *Antiviral Res*, 85, 328-45.  
355

356

357 **Fig. 1. Presence or absence of CFAV, PCLV and wMelPop in Aag2 and Aag2wMelPop cells.**  
358 Size distribution of small RNA molecules mapping to the CFAV **(a)** or PCLV **(b)** genome  
359 (black)/ antigenome (grey) in *Ae. aegypti*-derived Aag2 or wMelPop transfected Aag2 cells.  
360 **(c)** Size distribution of small RNA molecules mapping to the different segments of PCLV (S, M  
361 and L) genome/antigenome in *Ae. aegypti*-derived Aag2 or wMelPop transfected Aag2  
362 cells. **(d)** Detection of CFAV or PCLV in Aag2 and Aag2wMelPop cells by RT-PCR. Actin was  
363 used as loading control.

364

365 **Fig. 2. Effect of wMelPop on CFAV and PCLV infection in Aag2 cells. (a)** Detection of CFAV,  
366 *Wolbachia* or PCLV in Aag2, Aag2wMelPop and two different cultures of Aag2wMelPop cells  
367 treated with tetracycline (Aag2wMelPop-tet set 1 and 2) cells by RT-PCR. Actin was used as  
368 loading control. **(b)** Detection of CFAV or PCLV in C6/36 cells incubated with supernatant of  
369 Aag2, Aag2wMelPop or Aag2wMelPop treated with tetracycline (two different cultures,  
370 Aag2wMelPop-tet set 1 and 2) by RT-PCR. Actin was used as a loading control. **(c)**  
371 Quantification of CFAV RNA in Aag2wMelPop (Wol) or Aag2wMelPop treated with  
372 tetracycline (tet) cells after incubation with Aag2 supernatant containing CFAV by SYBR  
373 green. S7 was used as internal control. Relative RNA expression is represented as (CFAV/S7).  
374 Error bars show standard error of mean from three independent experiments. **(d)**  
375 Quantification of PCLV RNA in Aag2wMelPop (Wol) or Aag2wMelPop treated with  
376 tetracycline (tet) cells, either after incubation with Aag2 supernatant harbouring PCLV or  
377 untreated by SYBR green. S7 was used as an internal control. Relative RNA expression is  
378 represented as (PCLV/S7) and mock-infected tet cells were set to 1. Error bars show  
379 standard error of mean from three independent experiments. \* is  $p \leq 0.05$ .

380

381

382

383

384 **Supplementary data**

385

386 **Fig. S1: PCLV specific piRNAs in Aag2 cells.**

387 Relative nucleotide frequency and conservation per position of 28 nt long small RNAs  
388 mapping to the genome and antigenome of PCLV in Aag2 and Aag2wMelPop cells are  
389 indicated. Sequence is represented as DNA.

390

391 **Fig. S2: CFAV specific piRNAs in Aag2 cells.**

392 Relative nucleotide frequency and conservation per position of 28 nt small RNAs mapping to  
393 the genome and antigenome of CFAV in Aag2 cells are indicated. Sequence is represented as  
394 DNA.

395

396 **Fig. S3: Effect of tetracycline treatment on CFAV infection in Aag2 cells. (a)** Detection of  
397 CFAV (two different primer pairs: 3`UTR or non-structural region) and *Wolbachia* in Aag2,  
398 Aag2wMelPop and Aag2wMelPop cells treated with tetracycline by RT-PCR. Actin was used  
399 as loading control. **(b)** Detection of CFAV (two different primer pairs; 3`UTR or non-structural  
400 region) in Aag2 or Aag2 cells treated with tetracycline cells at different time points (passage  
401 1 top or passage 6 bottom) by RT-PCR. Actin was used as loading control.

402

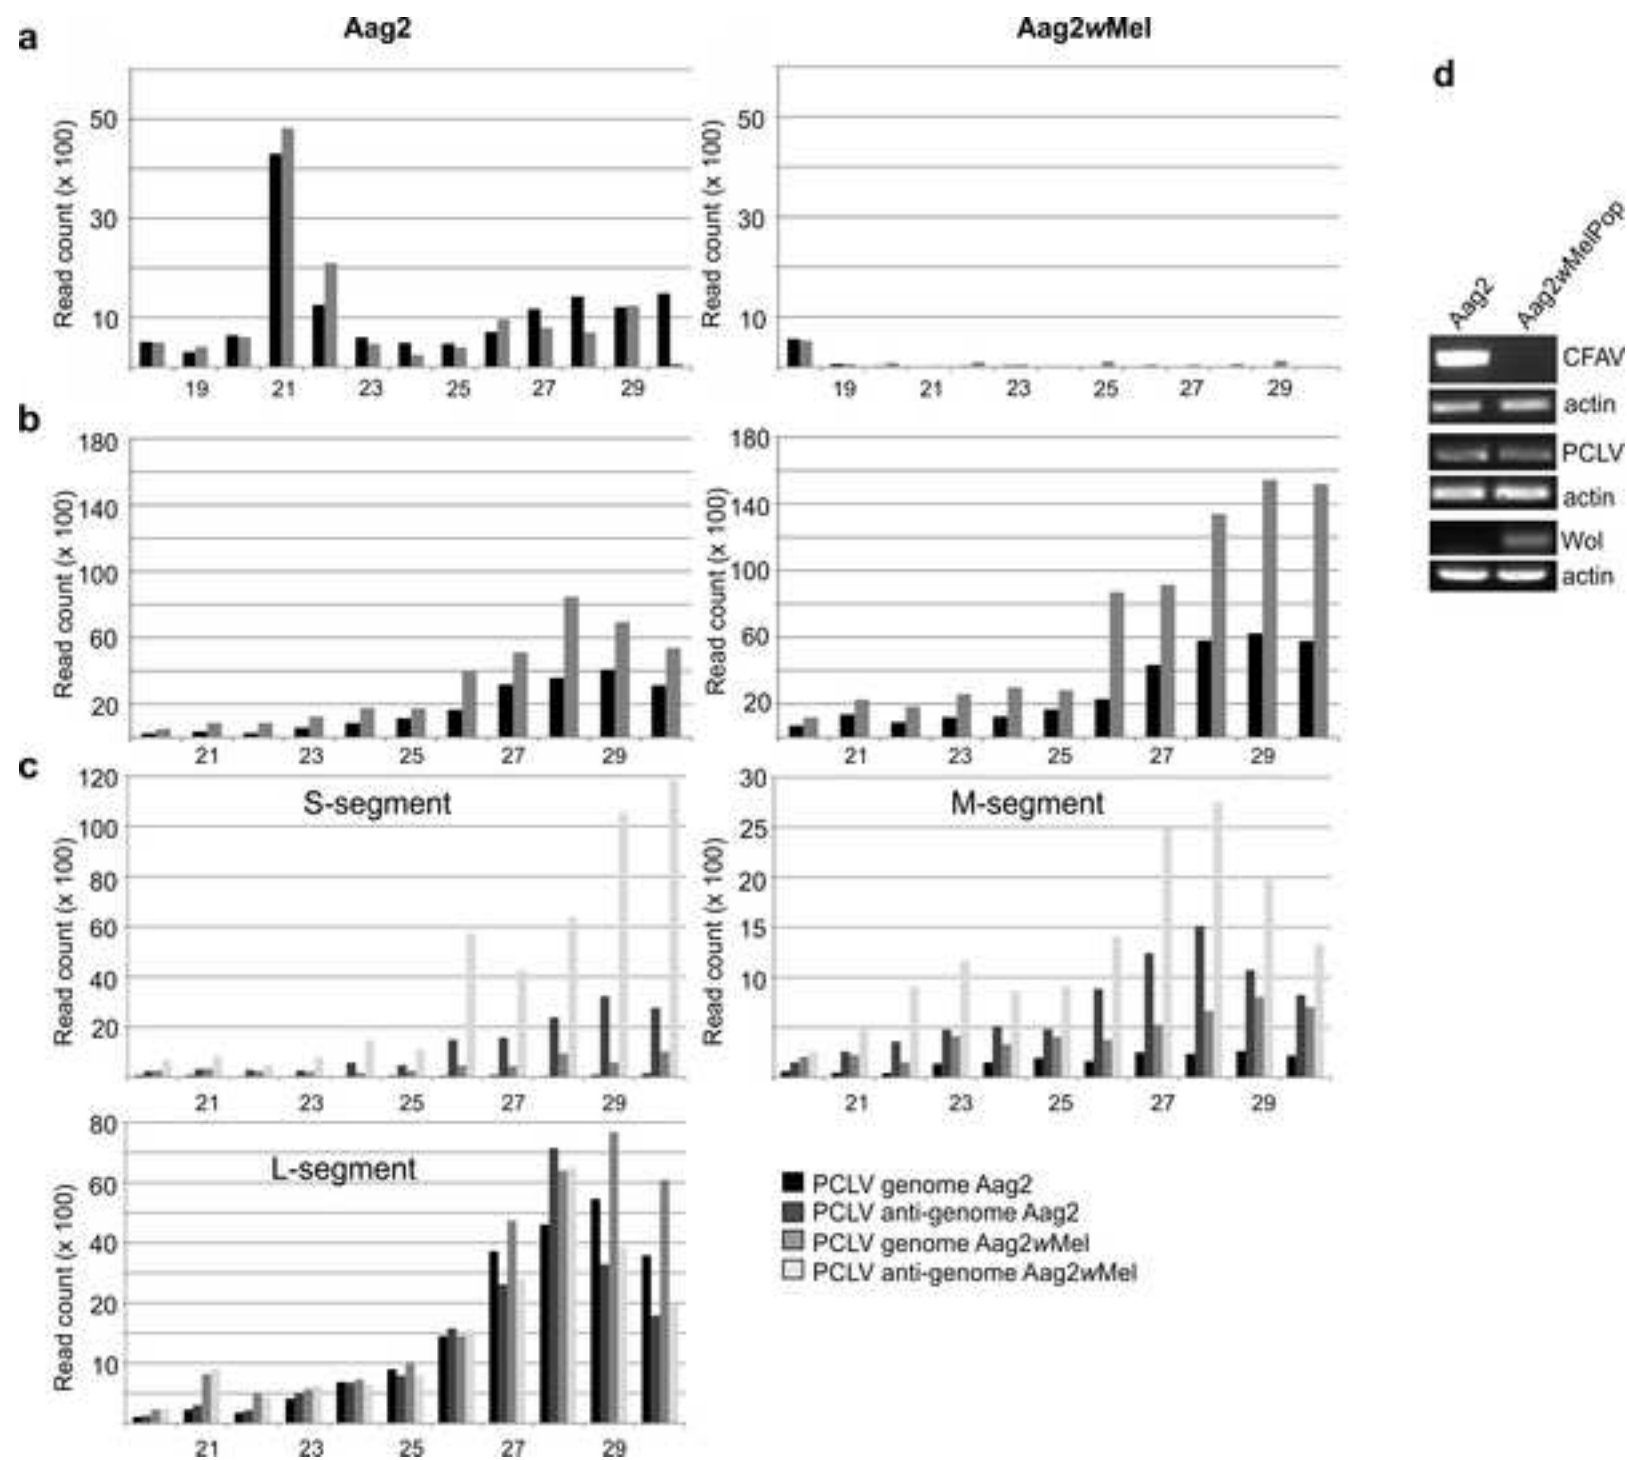



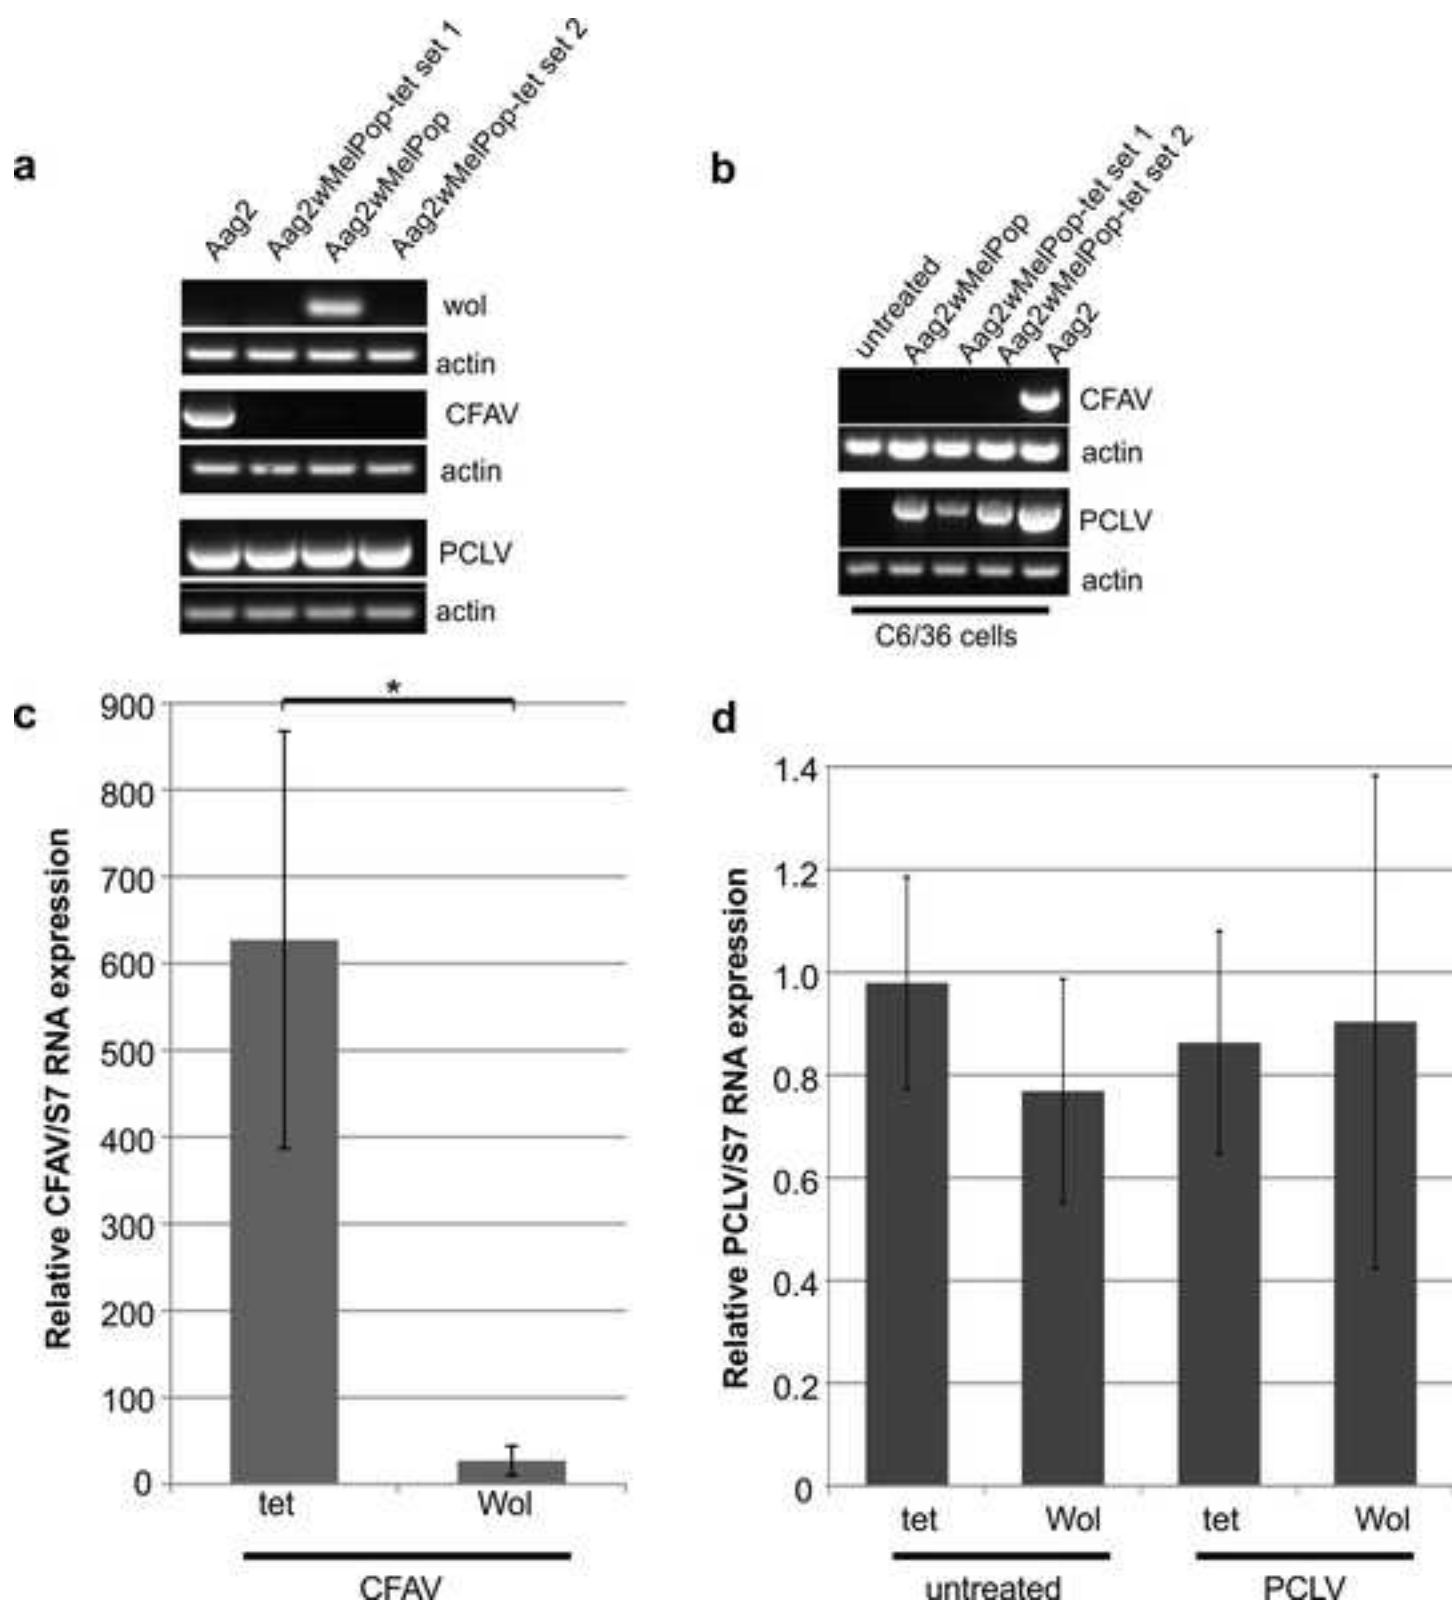

**Supplementary data Schnettler et al.**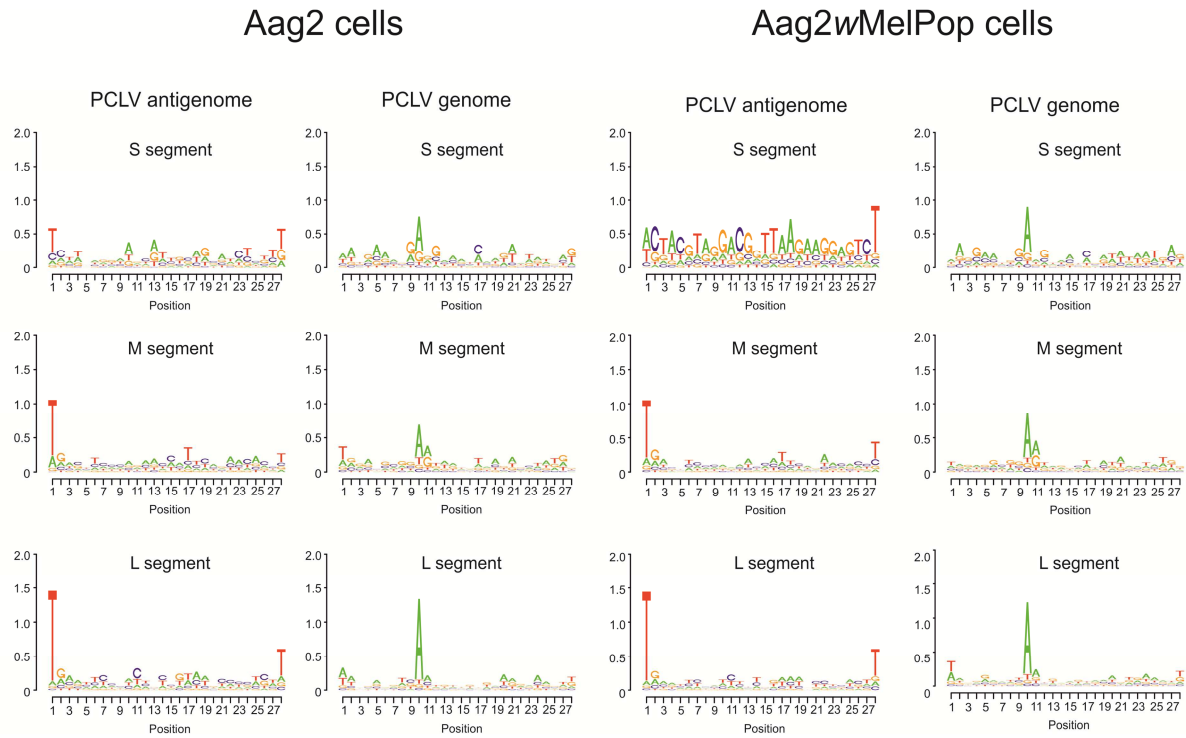**Fig. S1: PCLV specific piRNAs in Aag2 cells.**

Relative nucleotide frequency and conservation per position of 28 nt long small RNAs mapping to the genome and antigenome of PCLV in Aag2 and Aag2wMelPop cells are indicated. Sequence is represented as DNA.

# Aag2 cells

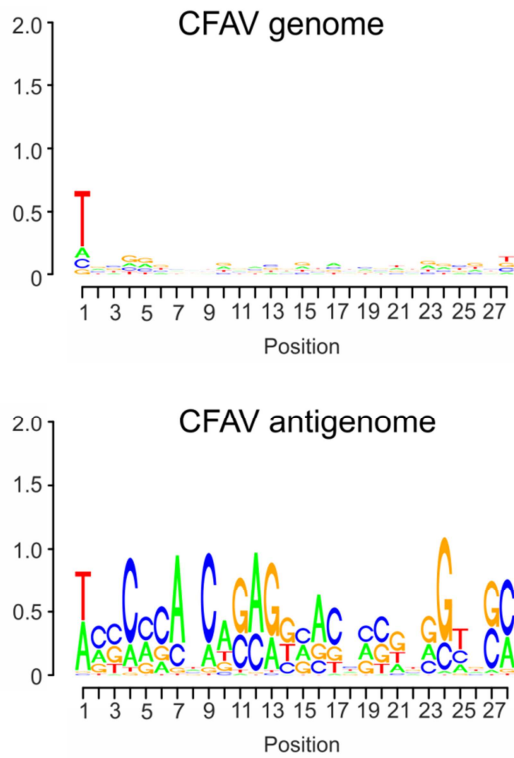

**Fig. S2: CFAV specific piRNAs in Aag2 cells.**

Relative nucleotide frequency and conservation per position of 28 nt small RNAs mapping to the genome and antigenome of CFAV in Aag2 cells are indicated. Sequence is represented as DNA.

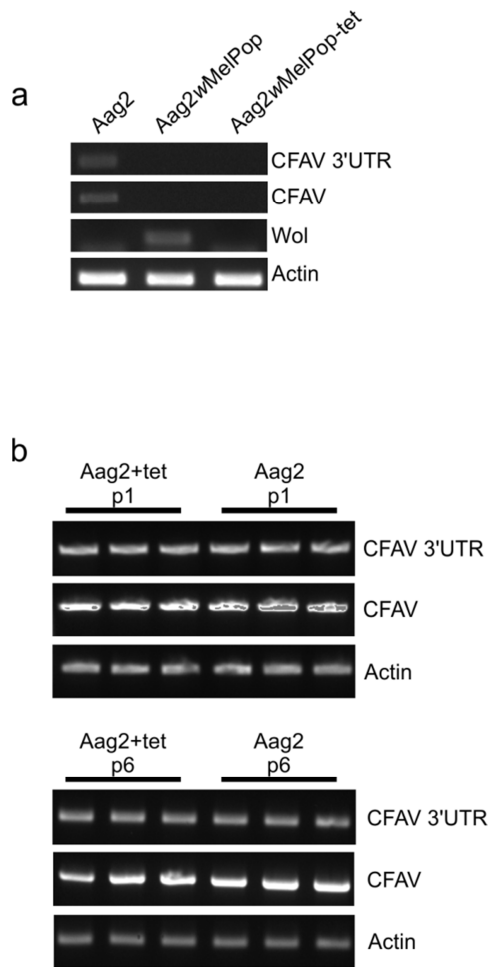

**Fig. S3: Effect of tetracycline treatment on CFAV infection in Aag2 cells. (a)** Detection of CFAV (two different primer pairs: 3`UTR or non-structural region) and *Wolbachia* in Aag2, Aag2wMelPop and Aag2wMelPop cells treated with tetracycline by RT-PCR. Actin was used as loading control. **(b)** Detection of CFAV (two different primer pairs; 3`UTR or non-structural region) in Aag2 or Aag2 cells treated with tetracycline cells at different time points (passage 1 top or passage 6 bottom) by RT-PCR. Actin was used as loading control.
